# Supplementary material for: A Single Talent Immunogenic Membrane Antigen and Novel Prognostic Predictor: voltage-dependent anion channel 1 (VDAC1) in Pancreatic Cancer
Source: PubMed Central journal article supplement (PMC5034259; doi:10.1038/srep33648), 2016-09-23
Supplement: srep33648-s1.pdf [file srep33648-s1.pdf]

**Title:** A Single Talent Immunogenic Membrane Antigen and Novel Prognostic

Predictor: voltage-dependent anion channel 1 (VDAC1) in Pancreatic Cancer

**Authors:** Weibin Wang, Taiping Zhang, Wenjing Zhao, Lai Xu, Yu Yang, Quan Liao, Yupei Zhao

Supplement data of 9 pancreatic cancer patients' characteristics

| Variables   | No. of patients |
|-------------|-----------------|
| Male        | 4               |
| Female      | 5               |
| Age (years) | Median = 60.3   |
| T1& T2      | 3               |
| T3a         | 6               |
| N0          | 2               |
| N1a         | 7               |
| G1a         | 0               |
| G2          | 4               |
| G3          | 5               |
